# Supplementary material for: How enzymatic activity is involved in chromatin organization
Source: eLife journal article supplement (doi:10.7554/elife.79901), 2022-12-06
Supplement: supp [file elife-79901-supp-v1.zip]

$\phi_A = 0.6$

Local nematic order param. of AA bonds

-0.1 0 0.1 0.2 0.3 0.4 0.5

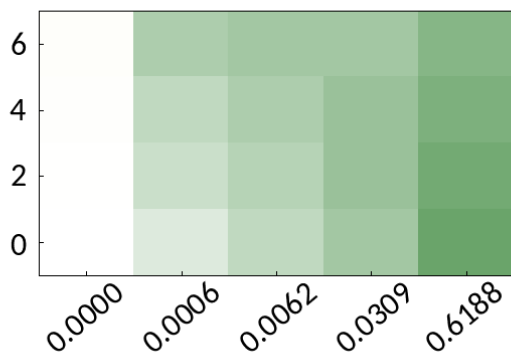

Local nematic order param. of BB bonds

-0.1 0 0.1 0.2 0.3 0.4 0.5

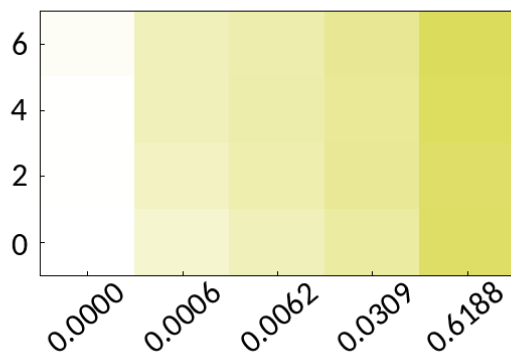

$\phi_A = 0.5$

Heterochromatin affinity ( $\epsilon_{HC}$ )

-0.1 0 0.1 0.2 0.3 0.4 0.5

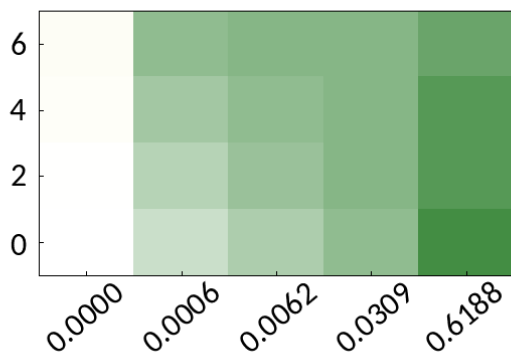

-0.1 0 0.1 0.2 0.3 0.4 0.5

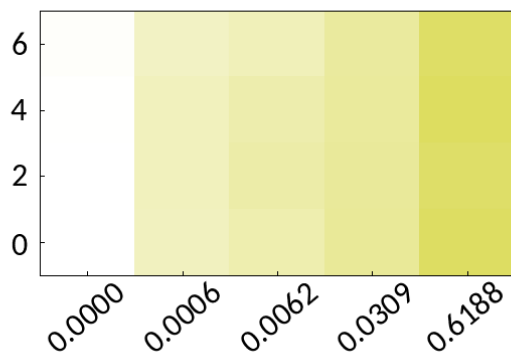

$\phi_A = 0.4$

-0.1 0 0.1 0.2 0.3 0.4 0.5

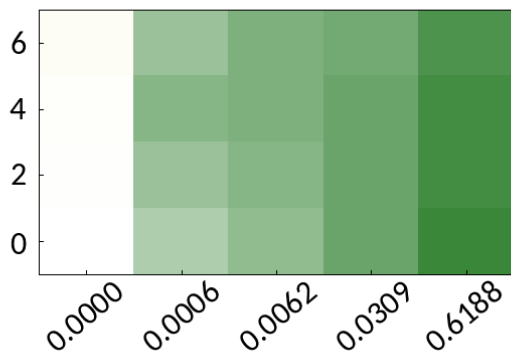

-0.1 0 0.1 0.2 0.3 0.4 0.5

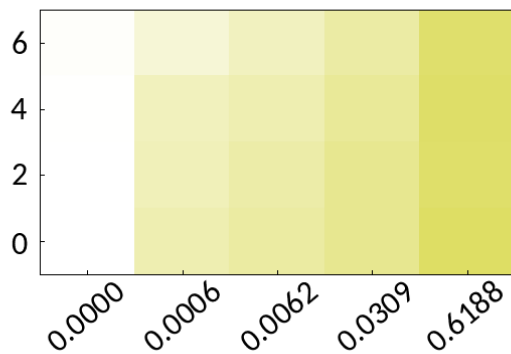

Enzymatic activity ( $\Lambda$ )
