# Supplementary material for: How enzymatic activity is involved in chromatin organization
Source: eLife journal article supplement (doi:10.7554/elife.79901), 2022-12-06

Top : Without enzymatic activity ( $\phi_A = 0.5$ ,  $\epsilon_{HC} = 4$ ,  $\Lambda = 0$ )

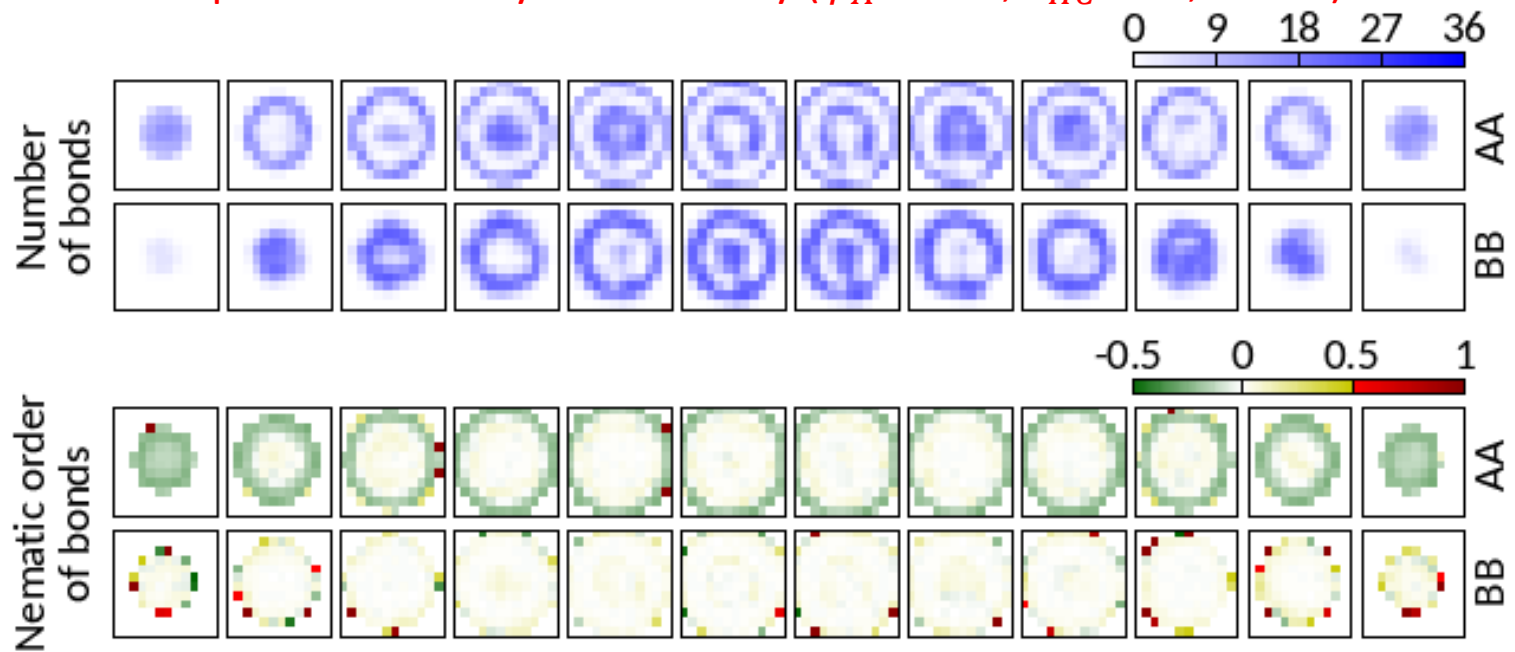

Bottom : With enzymatic activity ( $\phi_A = 0.5$ ,  $\epsilon_{HC} = 4$ ,  $\Lambda = 0.6188$ )

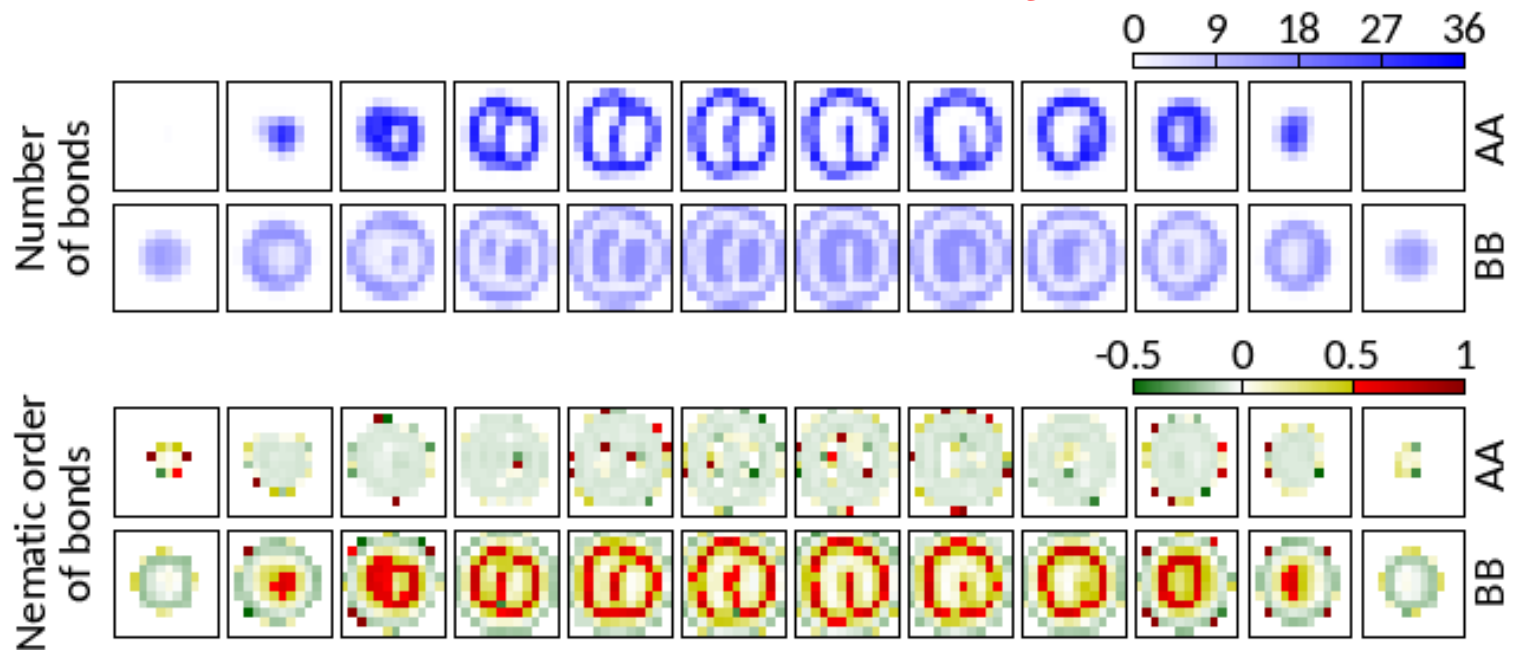

Supplement: supp [file elife-79901-supp-v1.zip]
