# Supplementary material for: How enzymatic activity is involved in chromatin organization
Source: eLife journal article supplement (doi:10.7554/elife.79901), 2022-12-06

**(a)**MdDAM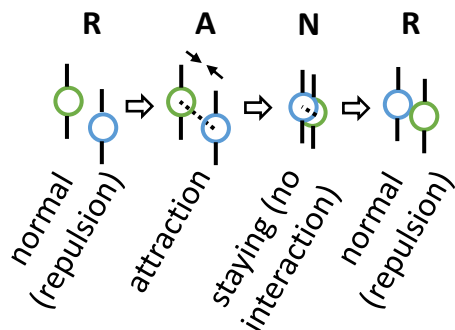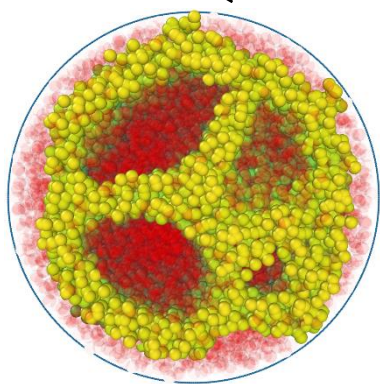**(b)**Two-state transient model RAR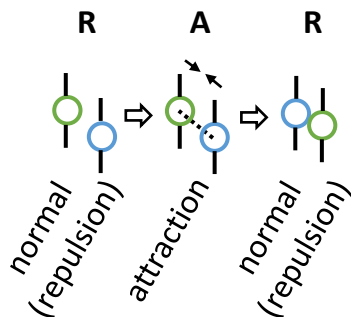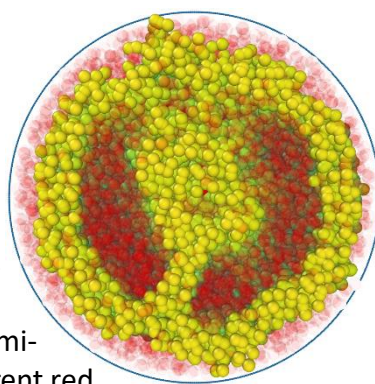**(c)**Two-state transient model RNR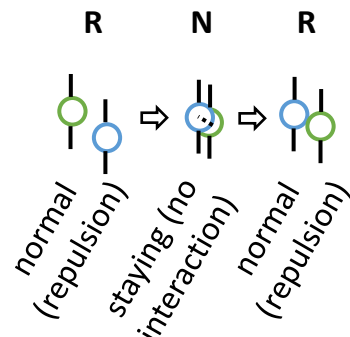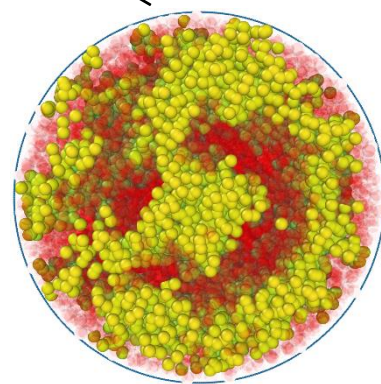**(d)**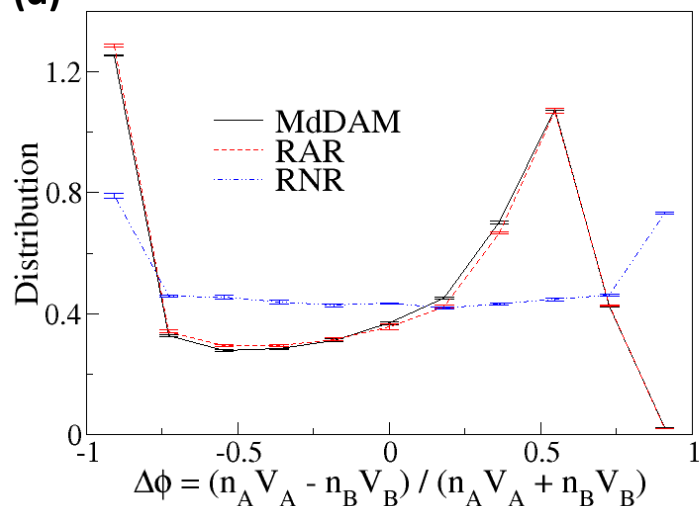**(e)**

Local nematic order of bonds

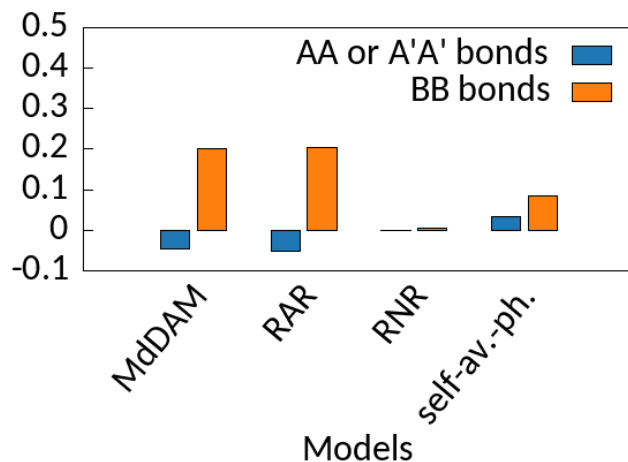

Supplement: supp [file elife-79901-supp-v1.zip]
