# Supplementary figures and images for: How enzymatic activity is involved in chromatin organization
Source: eLife journal article supplement (doi:10.7554/elife.79901), 2022-12-06

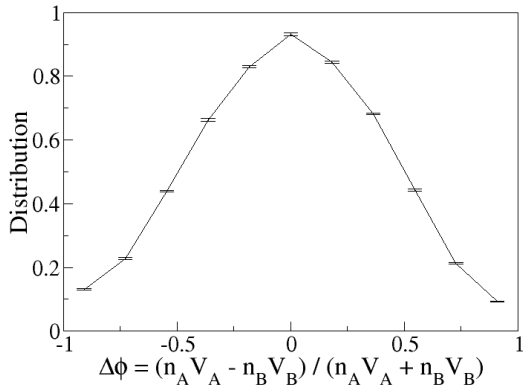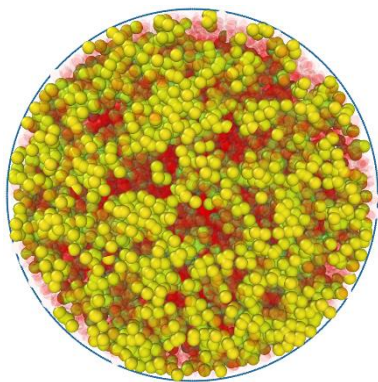

Pole

Position of A

Equator

B's in semi-transparent red

Supplement: supp [file elife-79901-supp-v1.zip]

**(a)**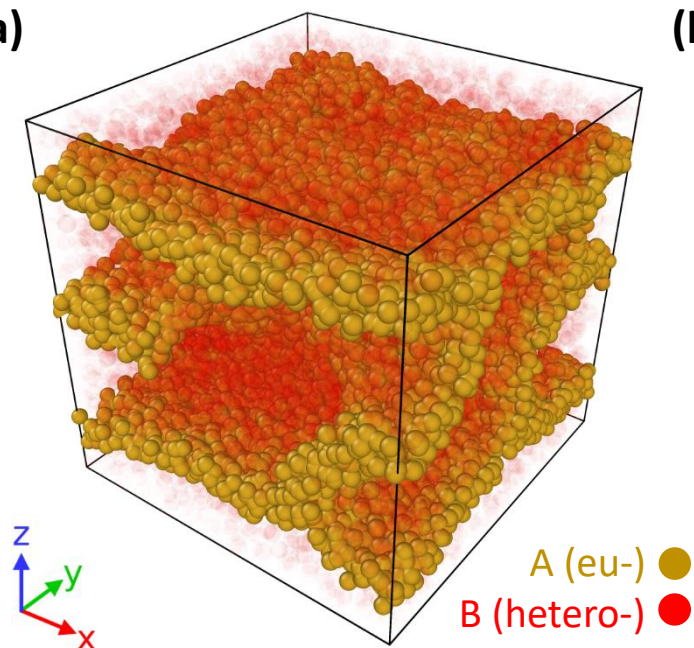**(b)**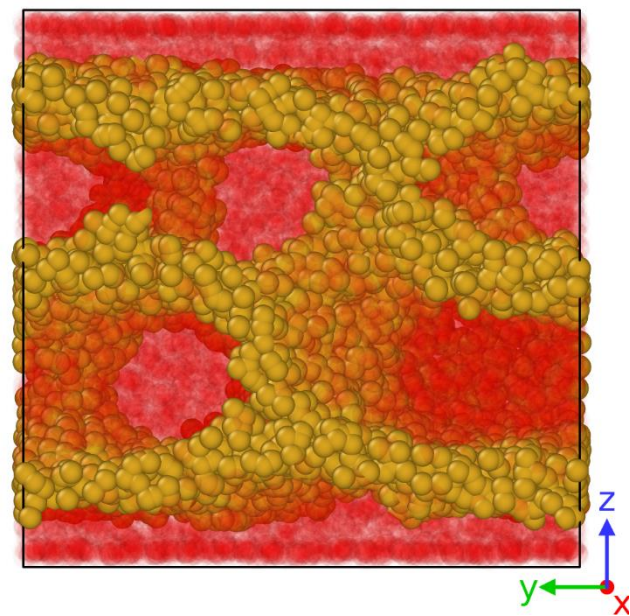**(c)**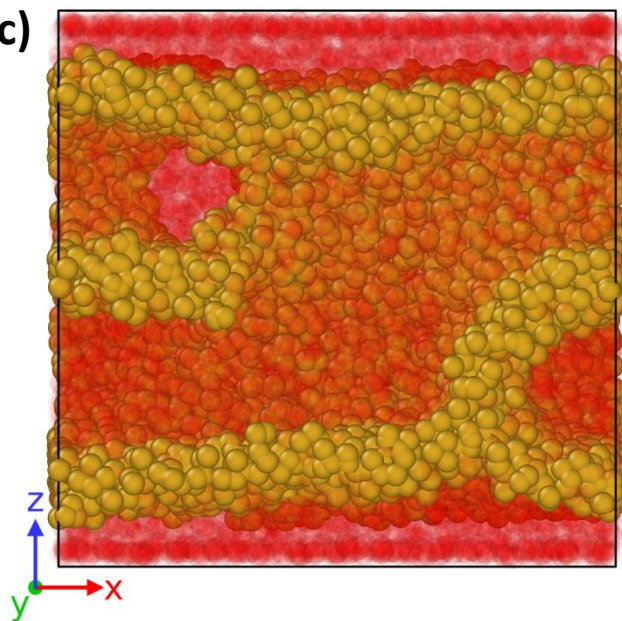**(d)**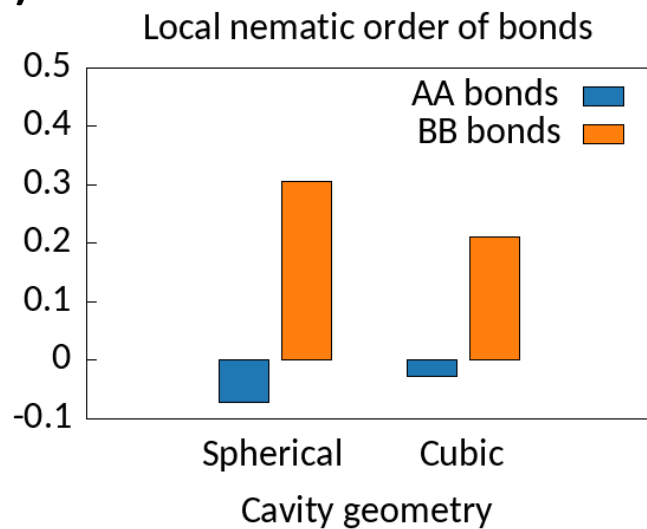

Supplement: supp [file elife-79901-supp-v1.zip]

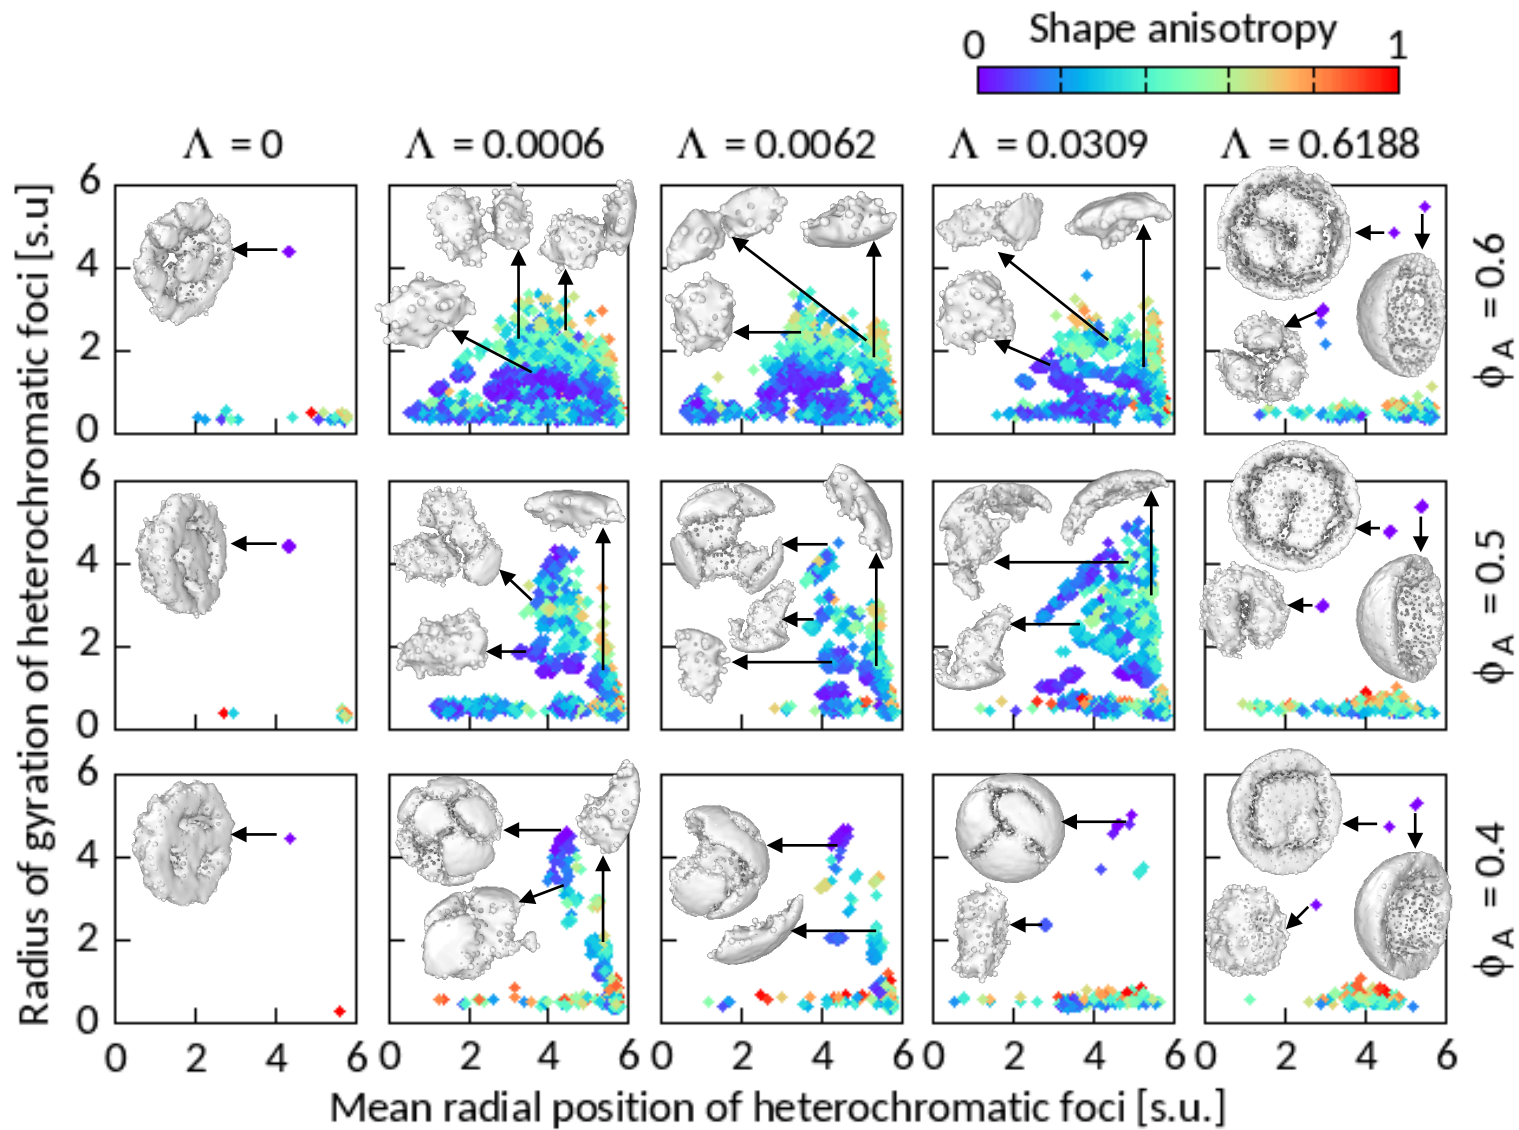

Supplement: supp [file elife-79901-supp-v1.zip]
